# Supplementary material for: Genome-Wide Association Study for Maize Hybrid Performance in a Typical Breeder Population
Source: MDPI journal article supplement (doi:10.3390/ijms25021190), 2024-01-18
Supplement: s1 [file s1]

## Supplementary Tables

### Table S1. Positive epistatic QTNs identified with model KinADE.

Detailed information was available in the attached Excel file.

### Table S2. Degree of dominance (d/a values) for the all QTNs identified by model KinADE.

Detailed information was available in the attached Excel file.

### Table S3. Candidate genes for all QTNs identified based on the model KinADE.

Detailed information was available in the attached Excel file.

### Table S4. The expression of PH, EH, RPR\_TIAG and RPR\_IUE candidate genes at seedling stage on B73, Mo17 and B73 × Mo17.

Detailed information was available in the attached Excel file.

### Table S5. The expression of GY and GM candidate genes at spikelet stage on CL11, NG5 and HYB (CL11 × NG5).

Detailed information was available in the attached Excel file.

### Table S6. The expression of GY and GM candidate genes at floret stage on CL11, NG5 and HYB (CL11 × NG5).

Detailed information was available in the attached Excel file.

### Table S7. Released hybrid varieties combined from elite line A008 (KA105).

| Hybrid Varieties Name | Approval No | Approved by      | Female | Male  |
|-----------------------|-------------|------------------|--------|-------|
| ShaanDan 679          | 20220397    | National/China   | KA105  | KB179 |
| ShaanDan 638          | 20220117    | National/China   | KA105  | KB024 |
| ShaanDan 660          | 20210062    | National/China   | KA105  | KB089 |
| ShaanDan 642          | 20210530    | National/China   | KA105  | KB207 |
| ShaanDan 620          | 20200264    | National/China   | KA105  | KB106 |
| ShaanDan 632          | 20220065    | Province/Shaanxi | KA105  | KB074 |
| ShaanDan 697          | 20220063    | Province/Shaanxi | KA105  | KB121 |
| ShaanDan 635          | 20220050    | Province/Shaanxi | KA105  | KB019 |
| ShaanDan 673          | 20220044    | Province/Shaanxi | KA105  | KB066 |
| ShaanDan 630          | 20220008    | Province/Shaanxi | KA105  | KB028 |
| ShaanDan 608          | 20210055    | Province/Shaanxi | KA105  | KB085 |
| ShaanDan 682          | 20210049    | Province/Shaanxi | KA105  | KB139 |
| ShaanDan 669          | 2020061     | Province/Shaanxi | KA105  | KB109 |
| ShaanDan 619          | 2020053     | Province/Shaanxi | KA105  | KB020 |
| ShaanDan 662          | 2020046     | Province/Shaanxi | KA105  | KB128 |
| ShaanDan 659          | 2020010     | Province/Shaanxi | KA105  | KB107 |
| ShaanDan 658          | 2019001     | Province/Shaanxi | KA105  | KB025 |
| ShaanDan 618          | 2015006     | Province/Shaanxi | KA105  | KB081 |
