# Supplementary figures and images for: Genome-Wide Association Study for Maize Hybrid Performance in a Typical Breeder Population
Source: MDPI journal article supplement (doi:10.3390/ijms25021190), 2024-01-18

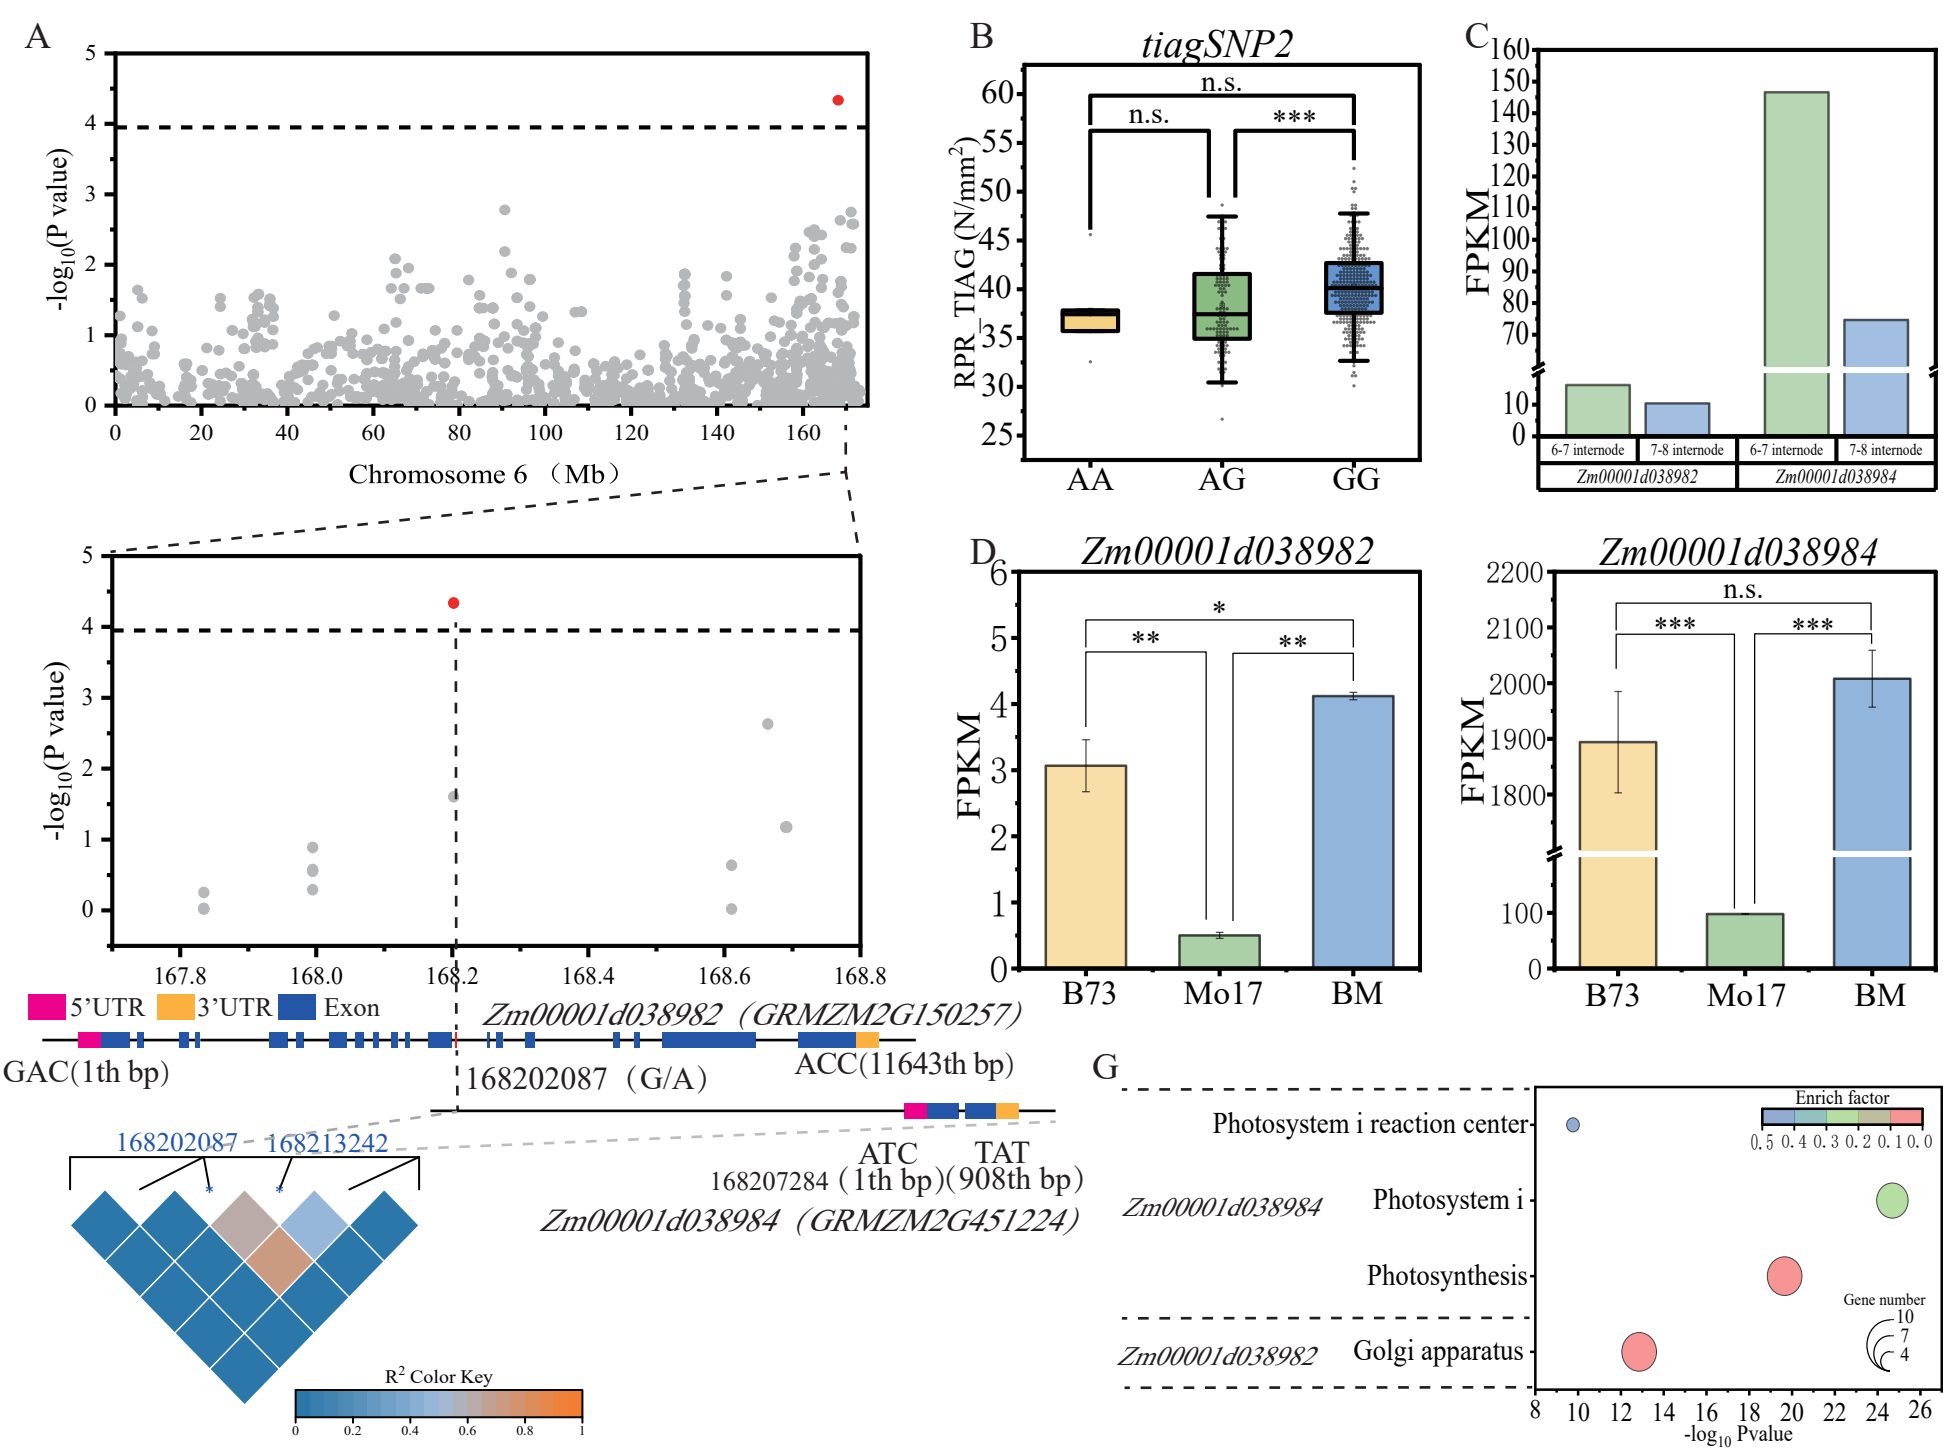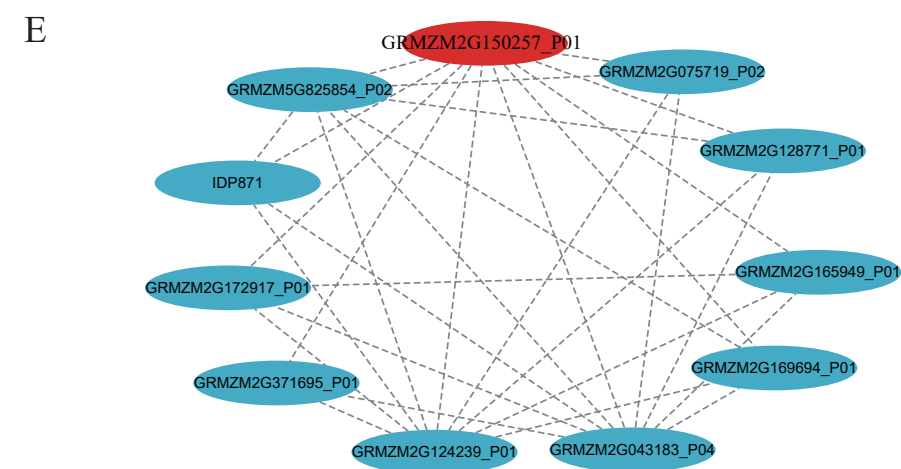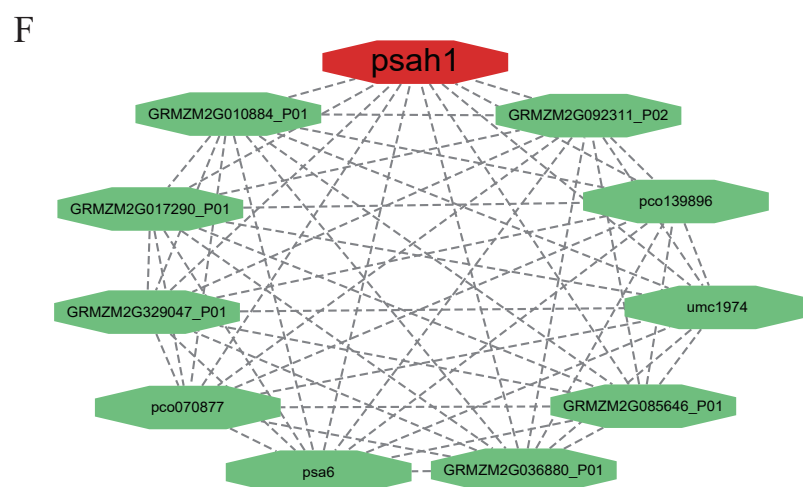

Supplement: s1 [file s1]

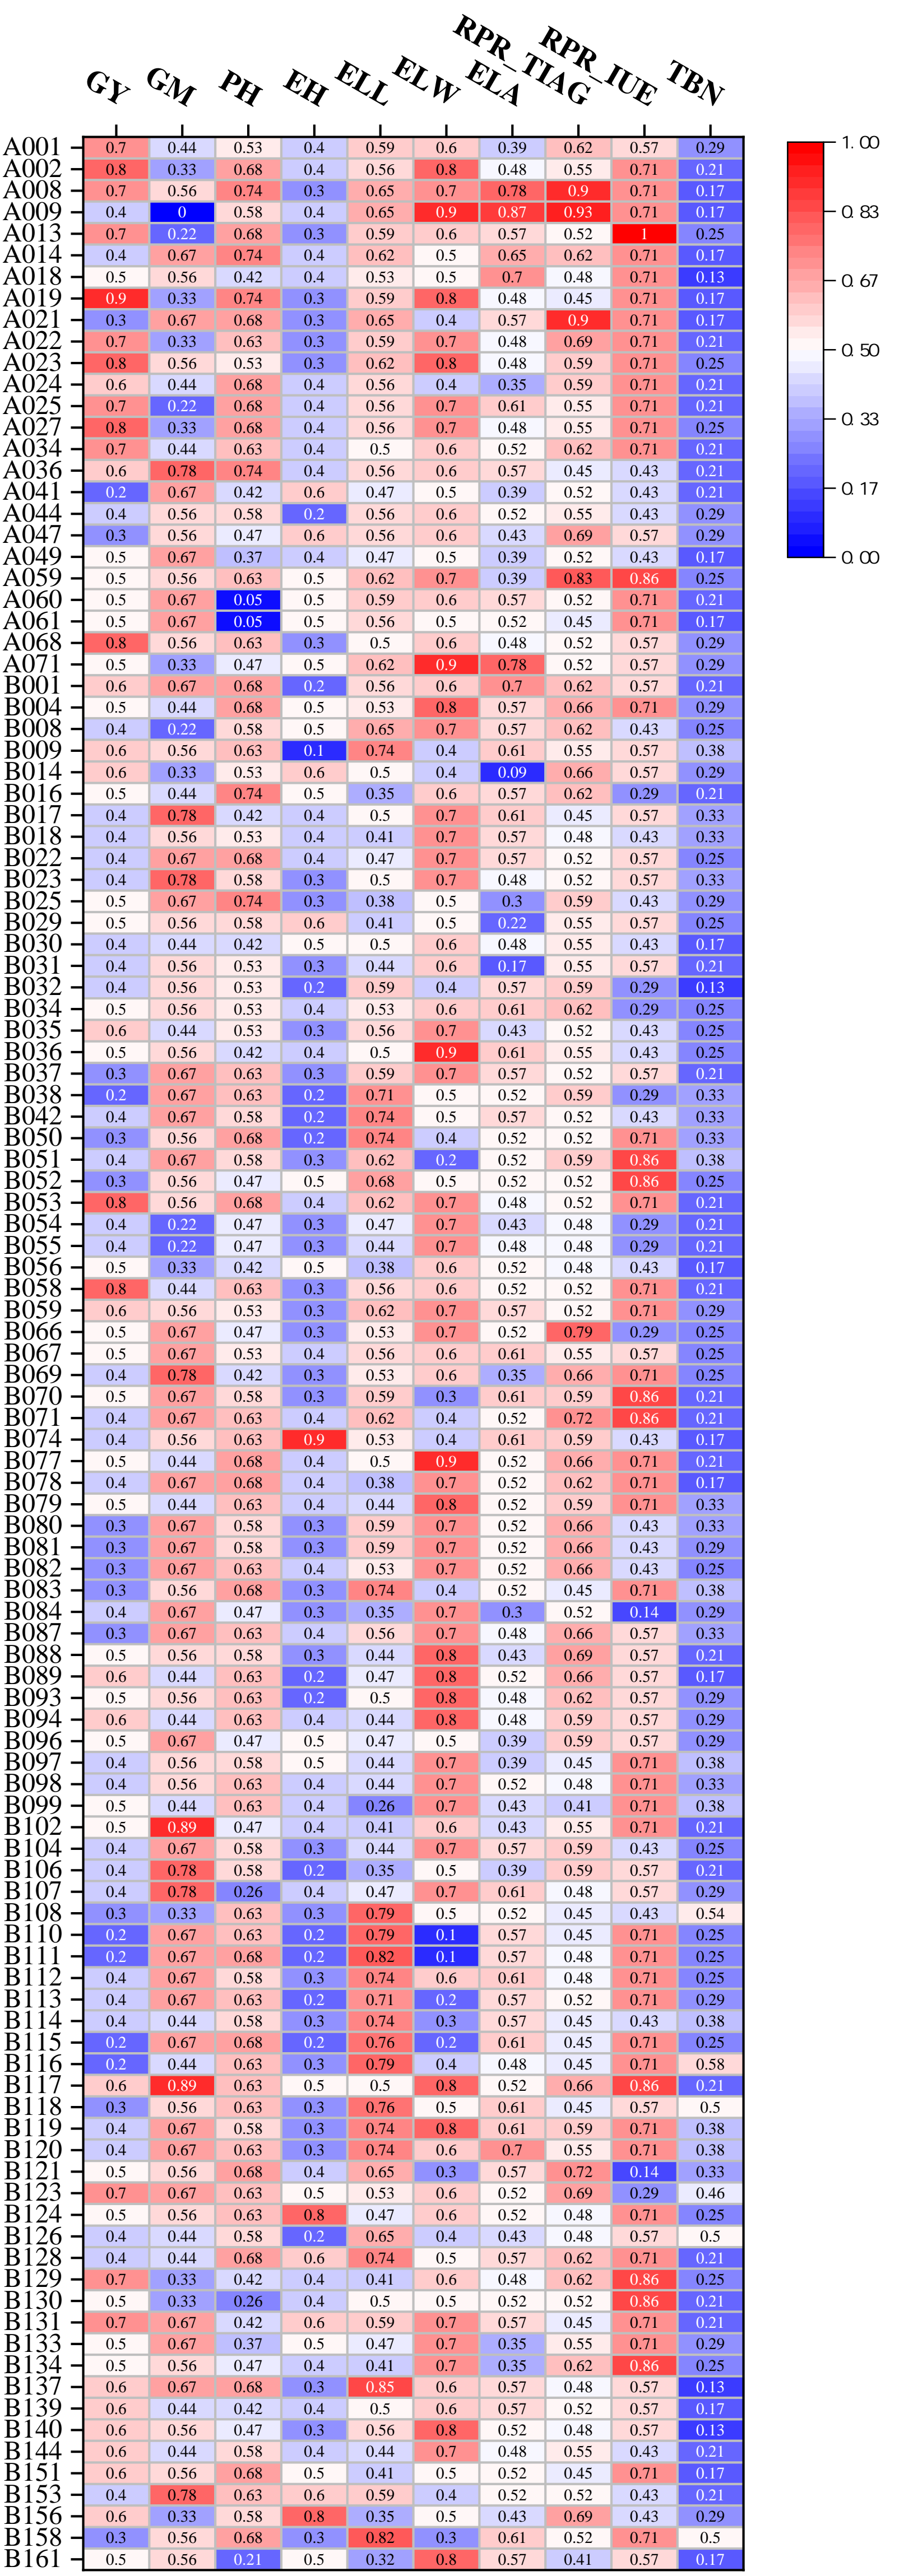

Supplement: s1 [file s1]

A

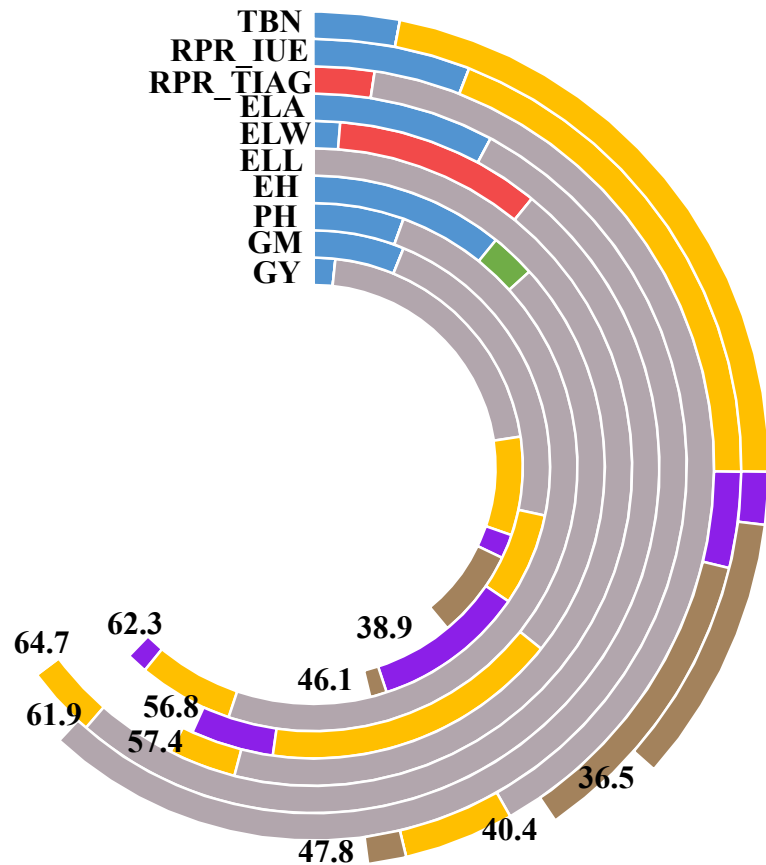

B

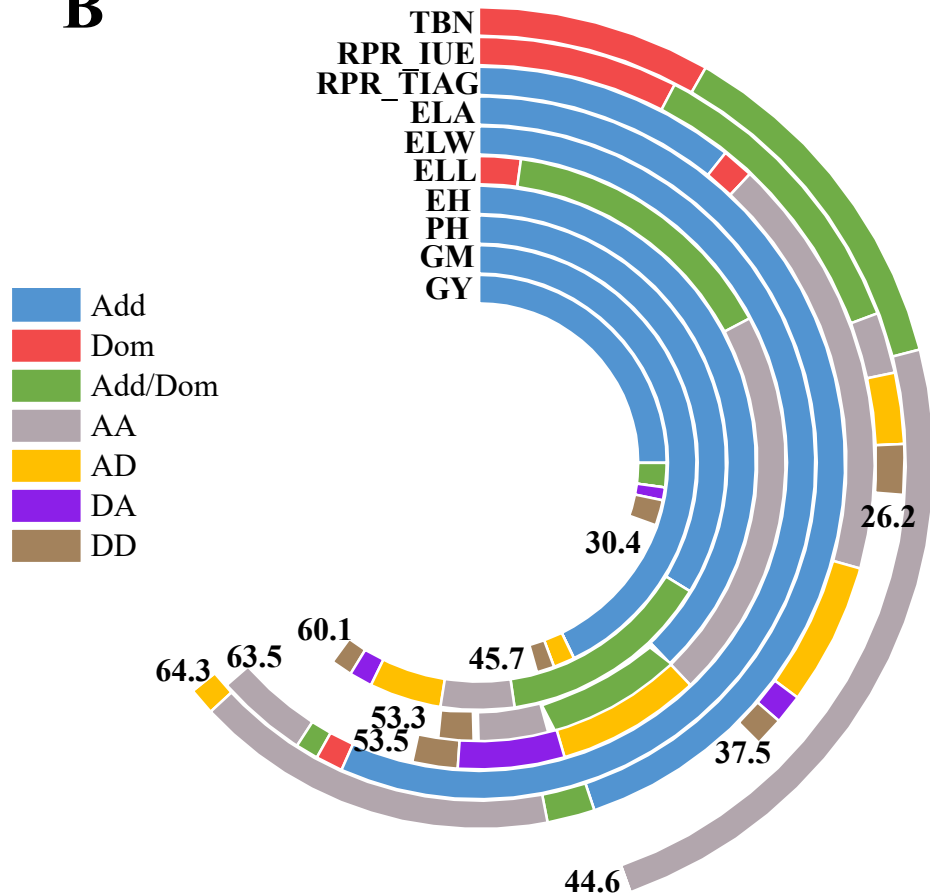

Supplement: s1 [file s1]

A

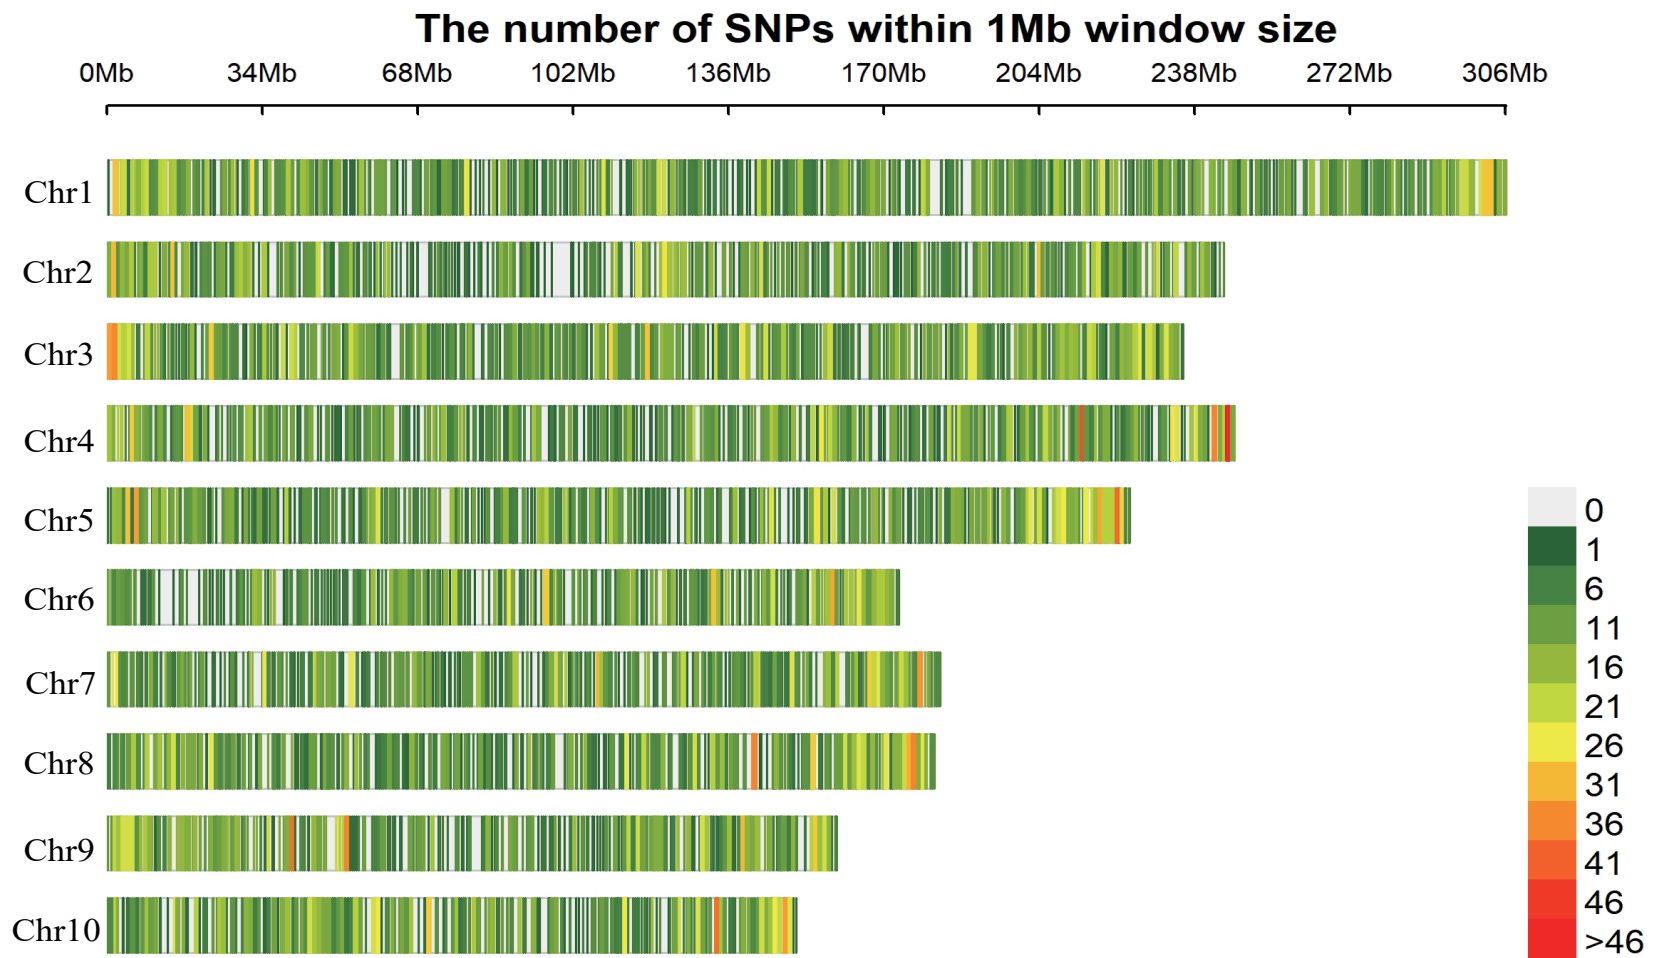

C

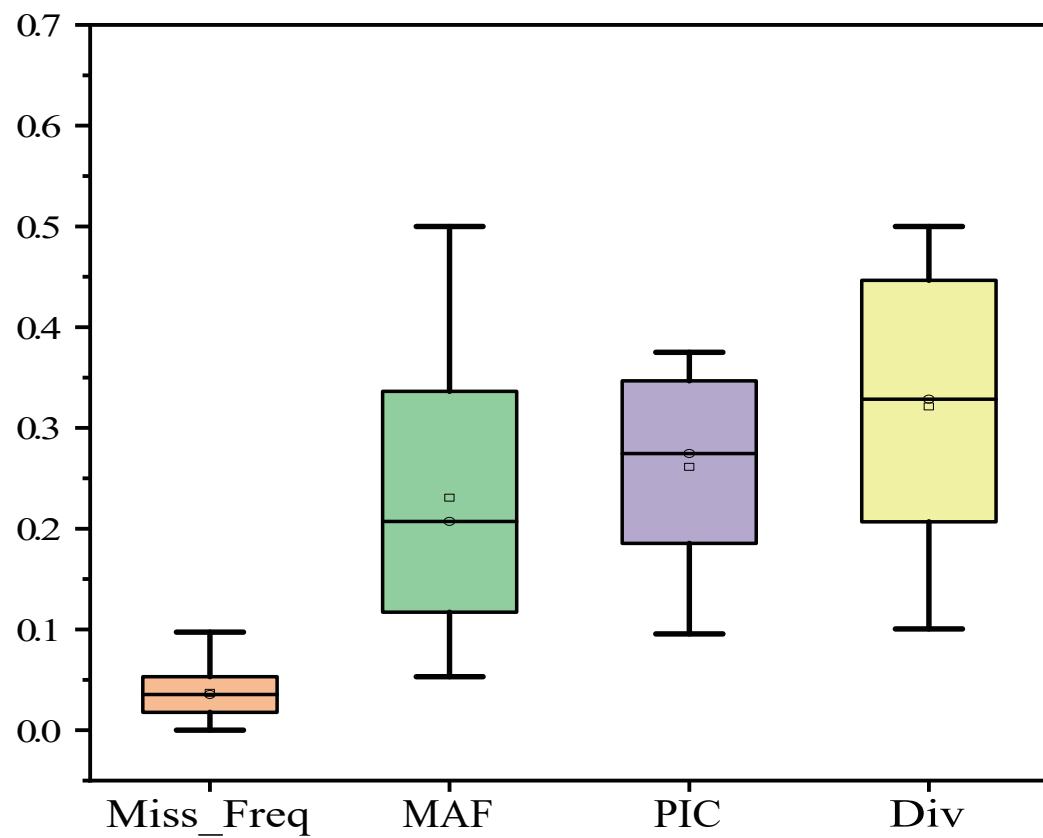

B

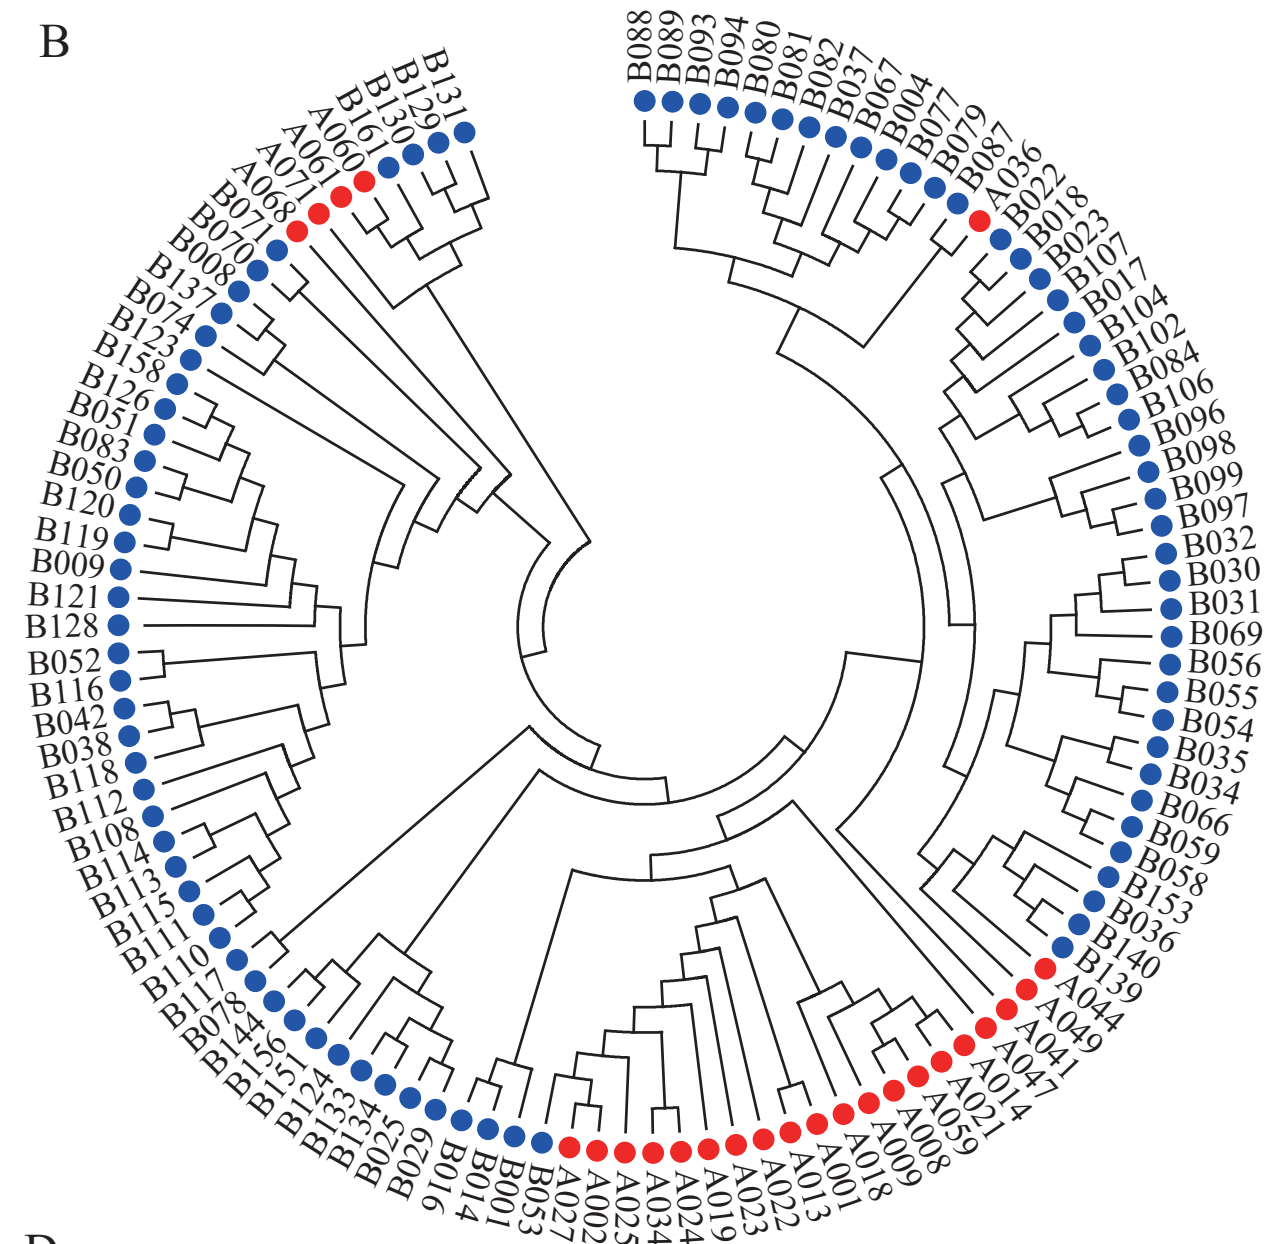

D

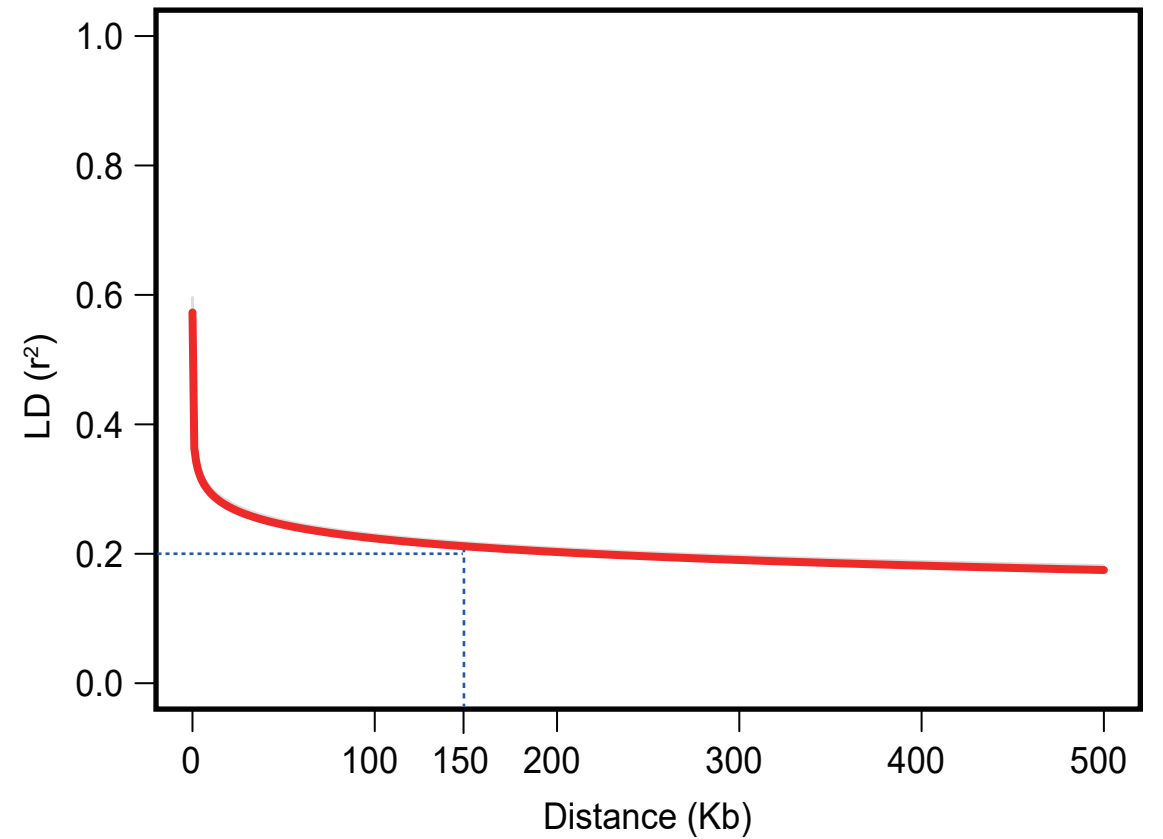

Supplement: s1 [file s1]

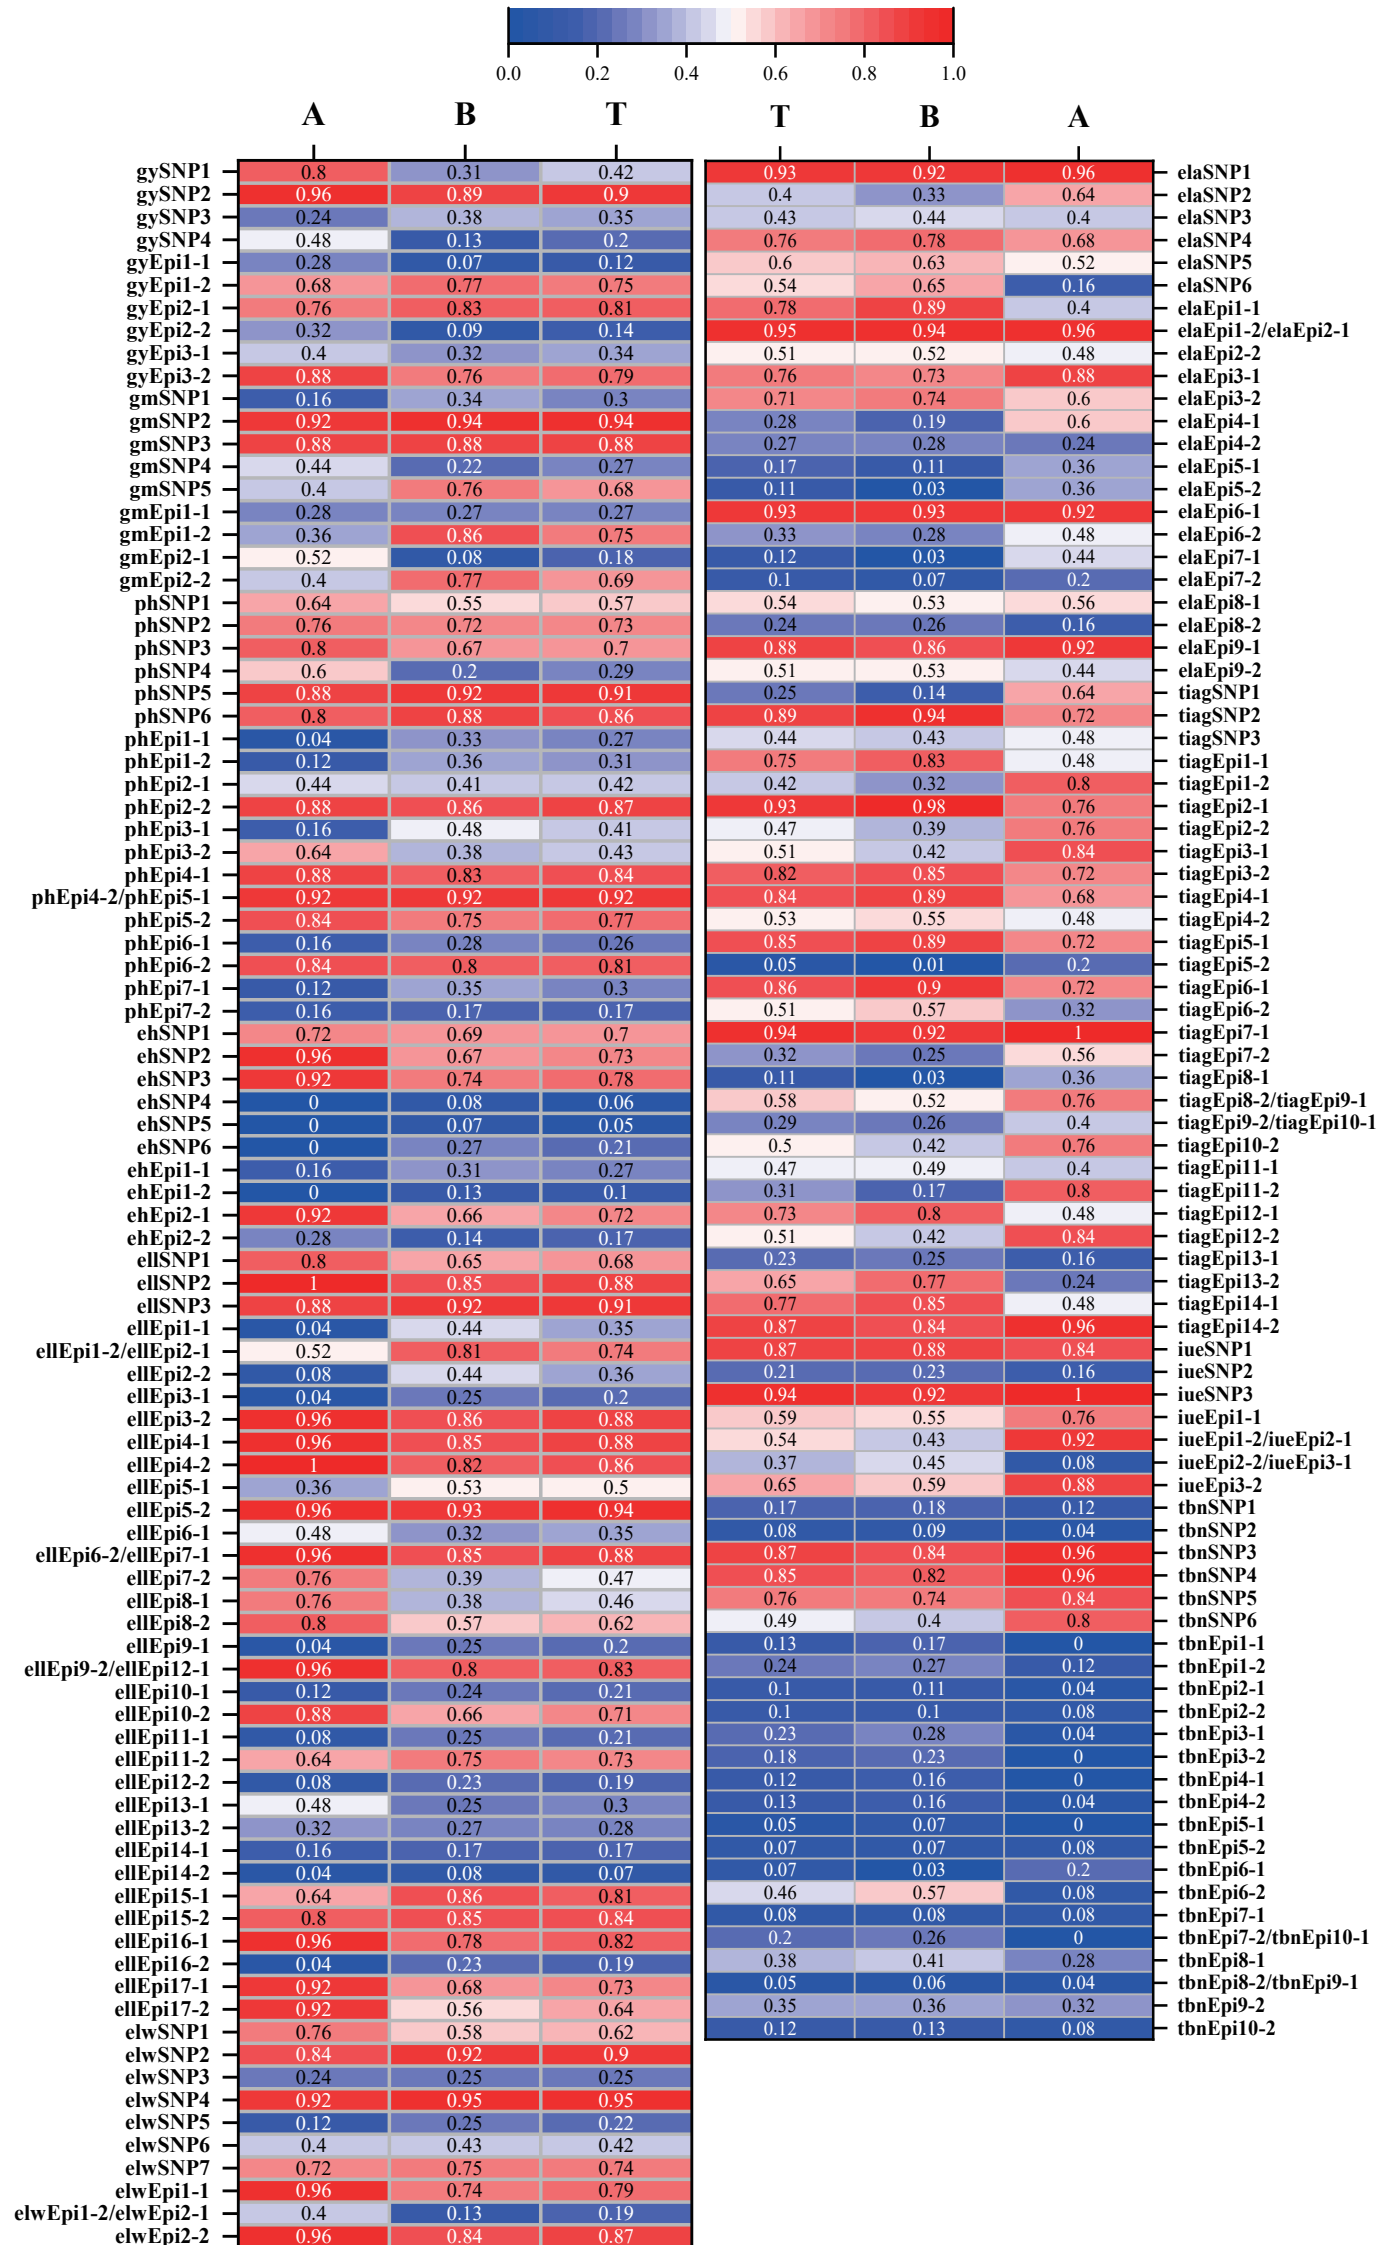

Supplement: s1 [file s1]

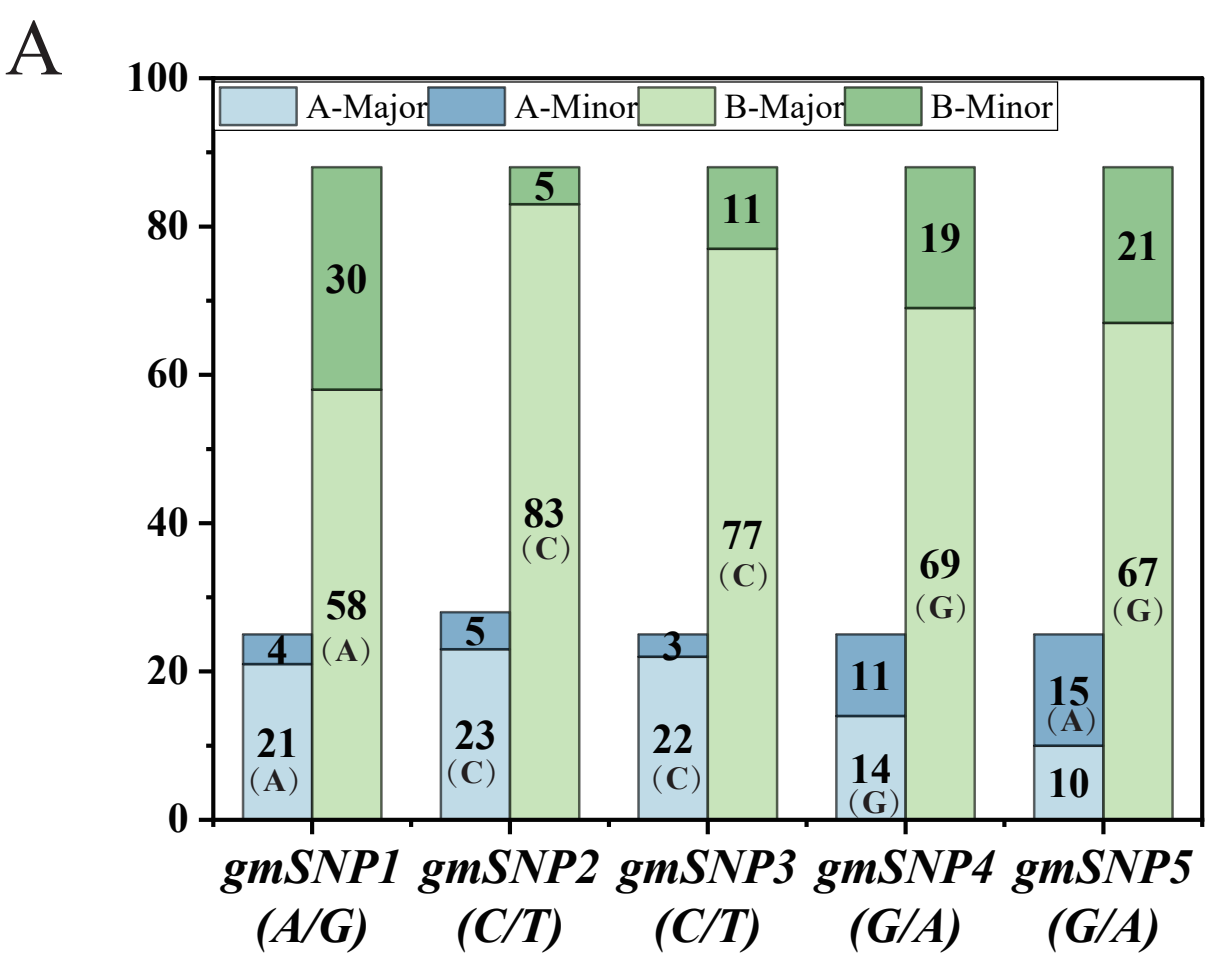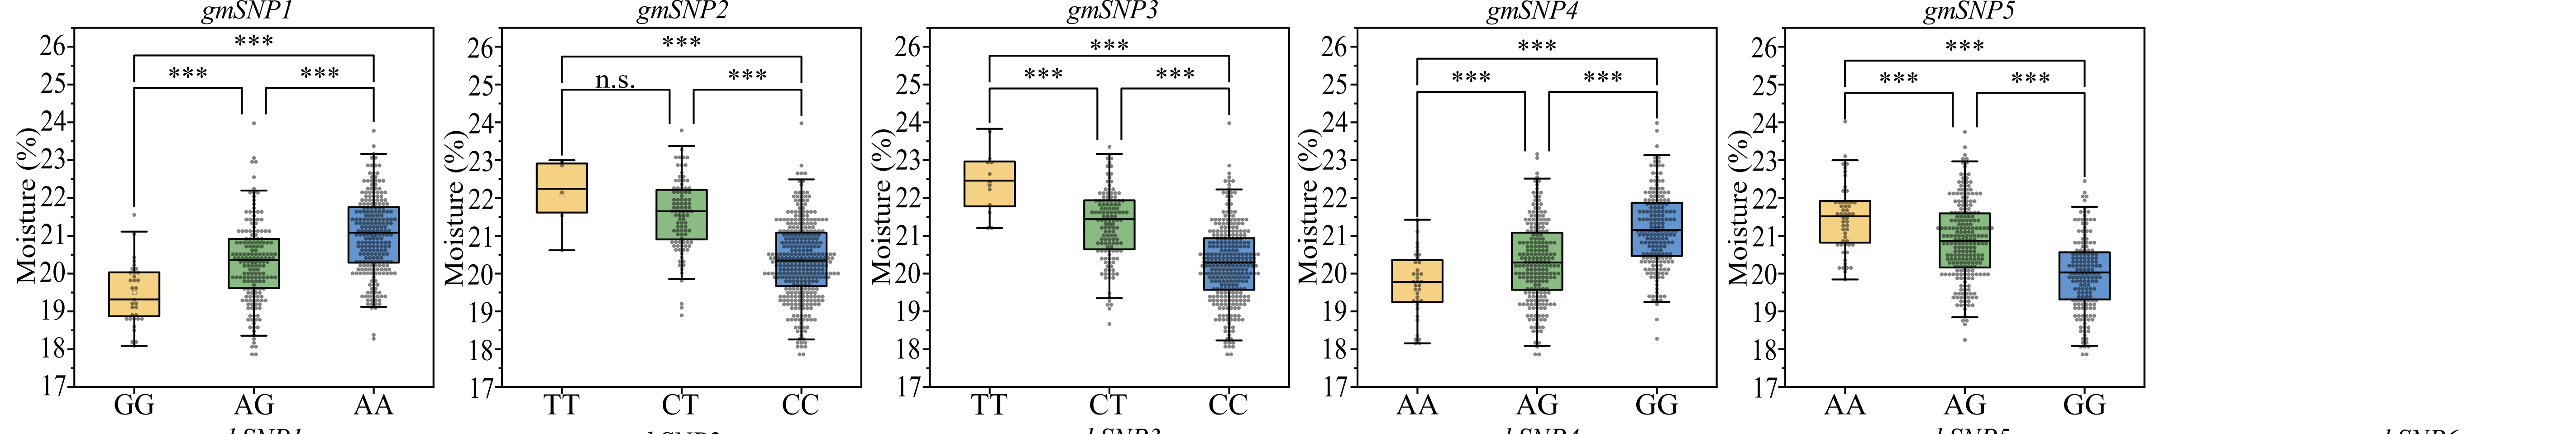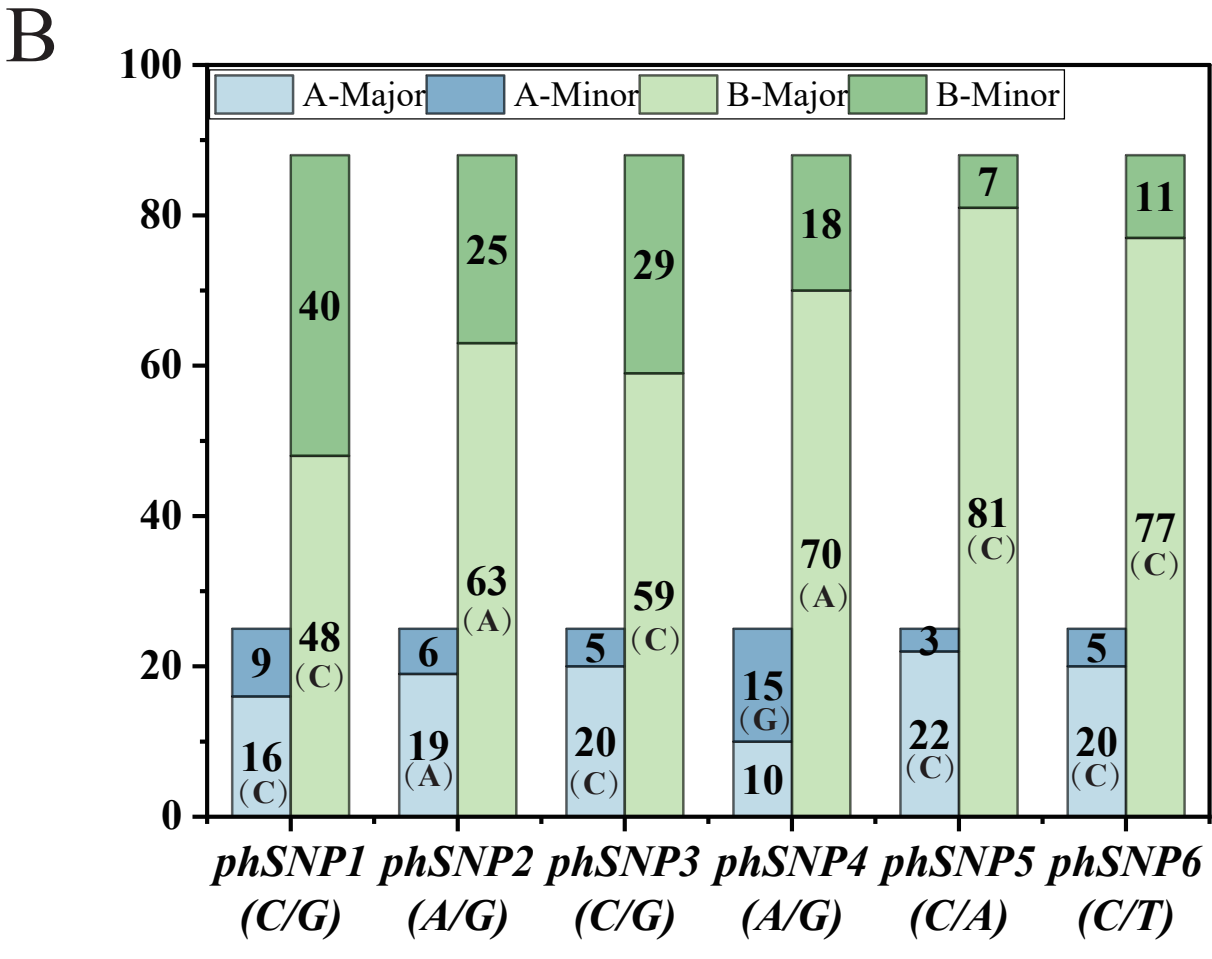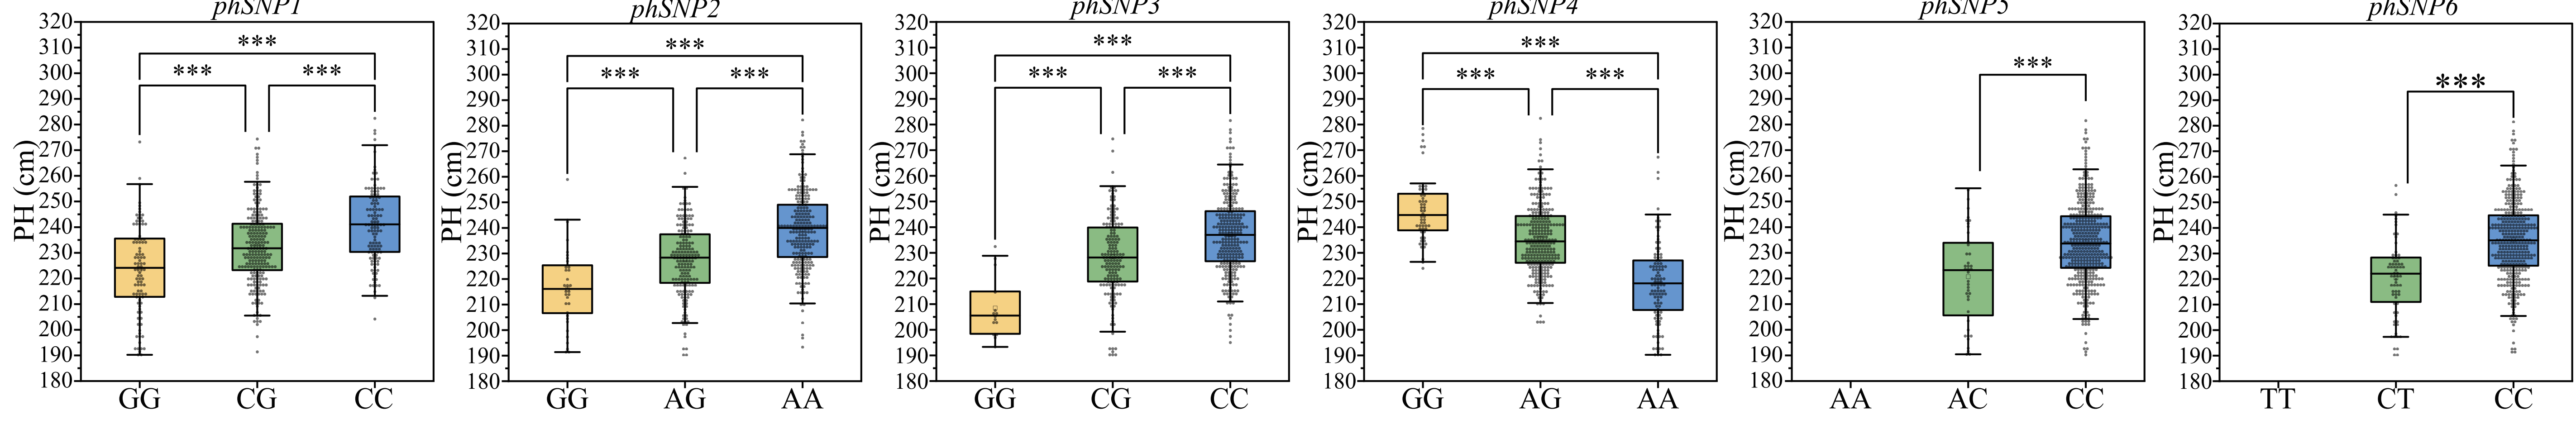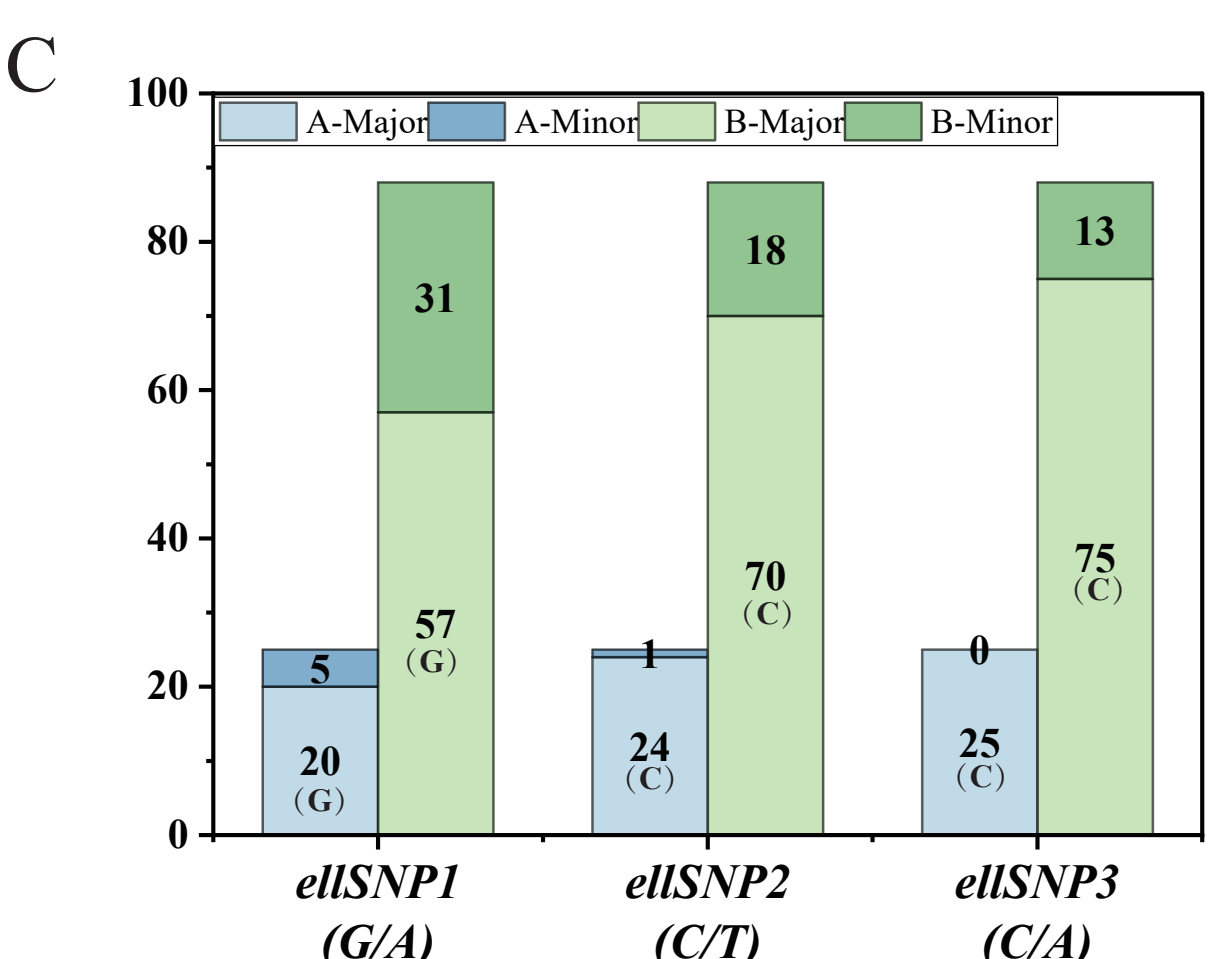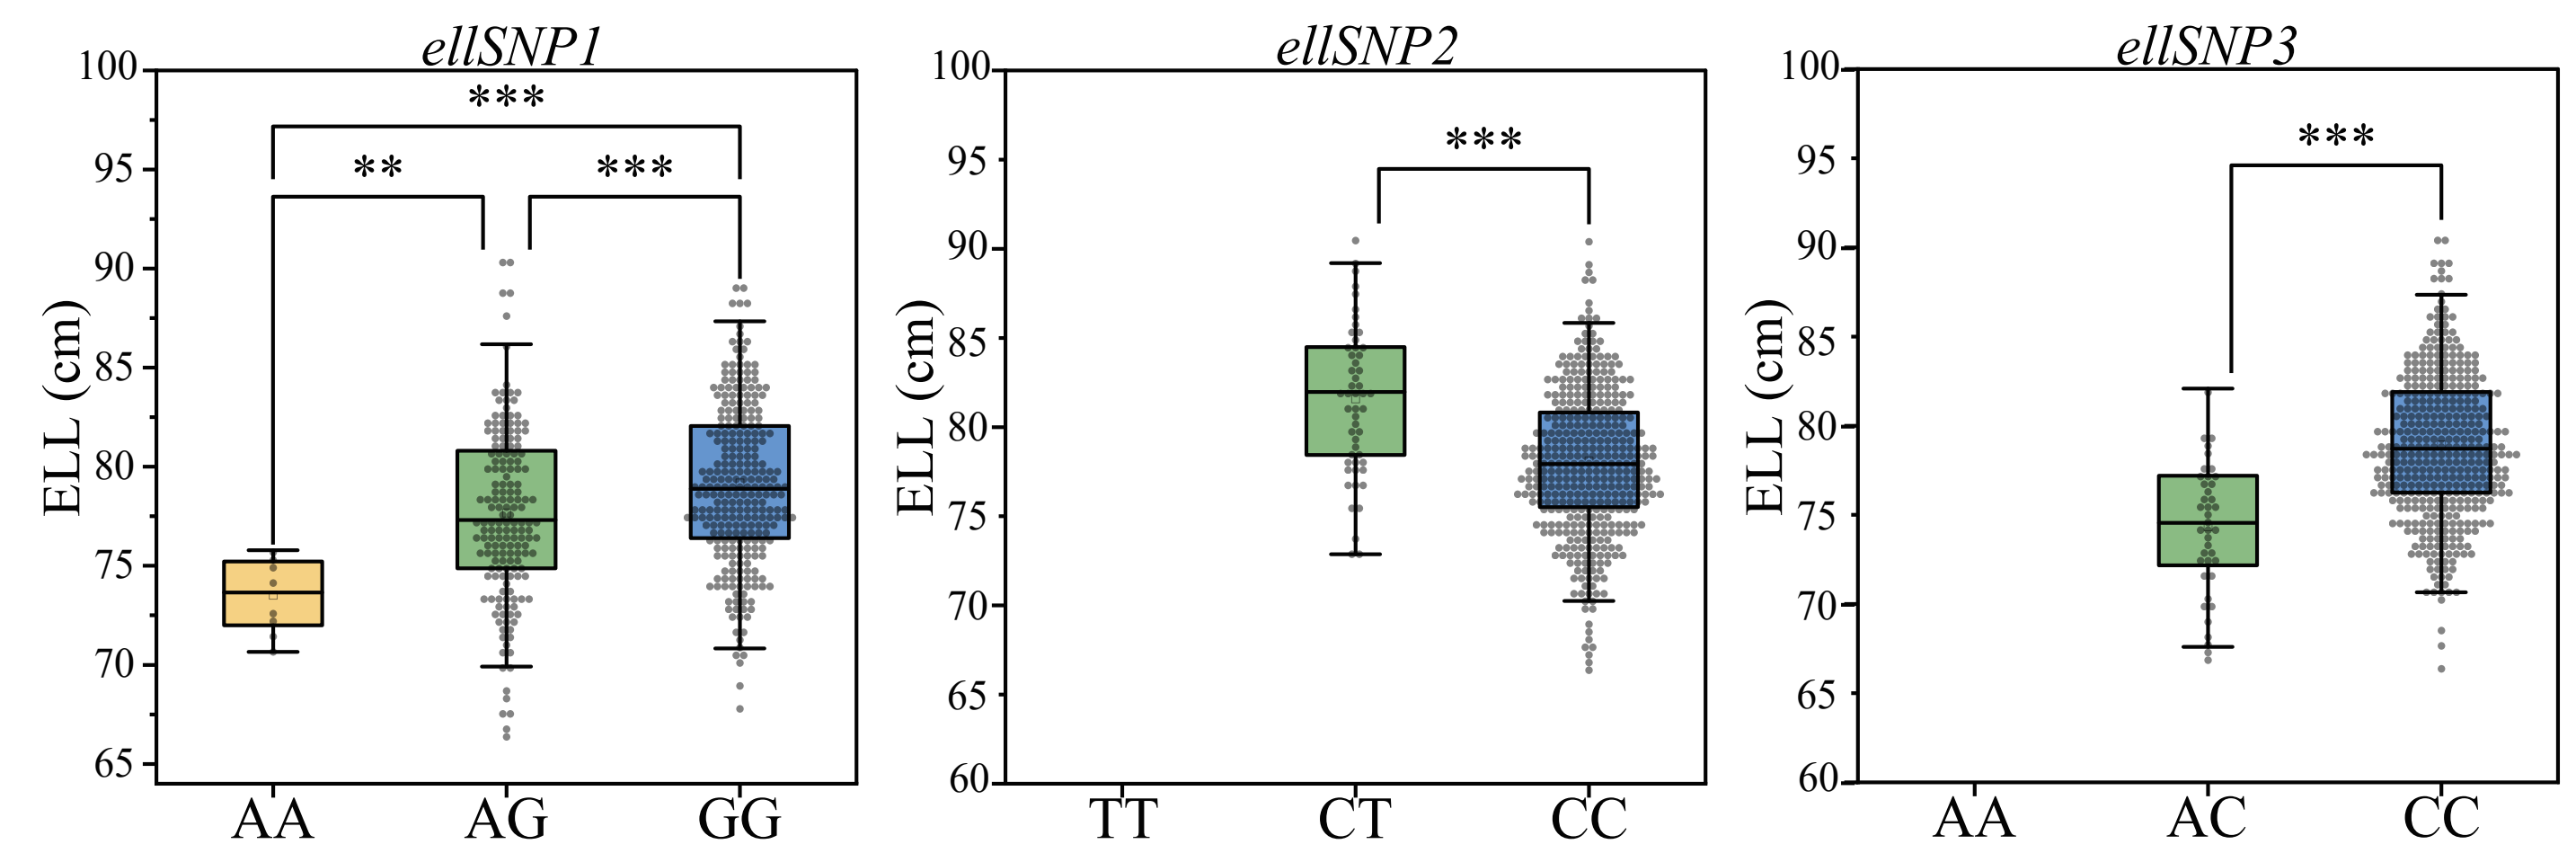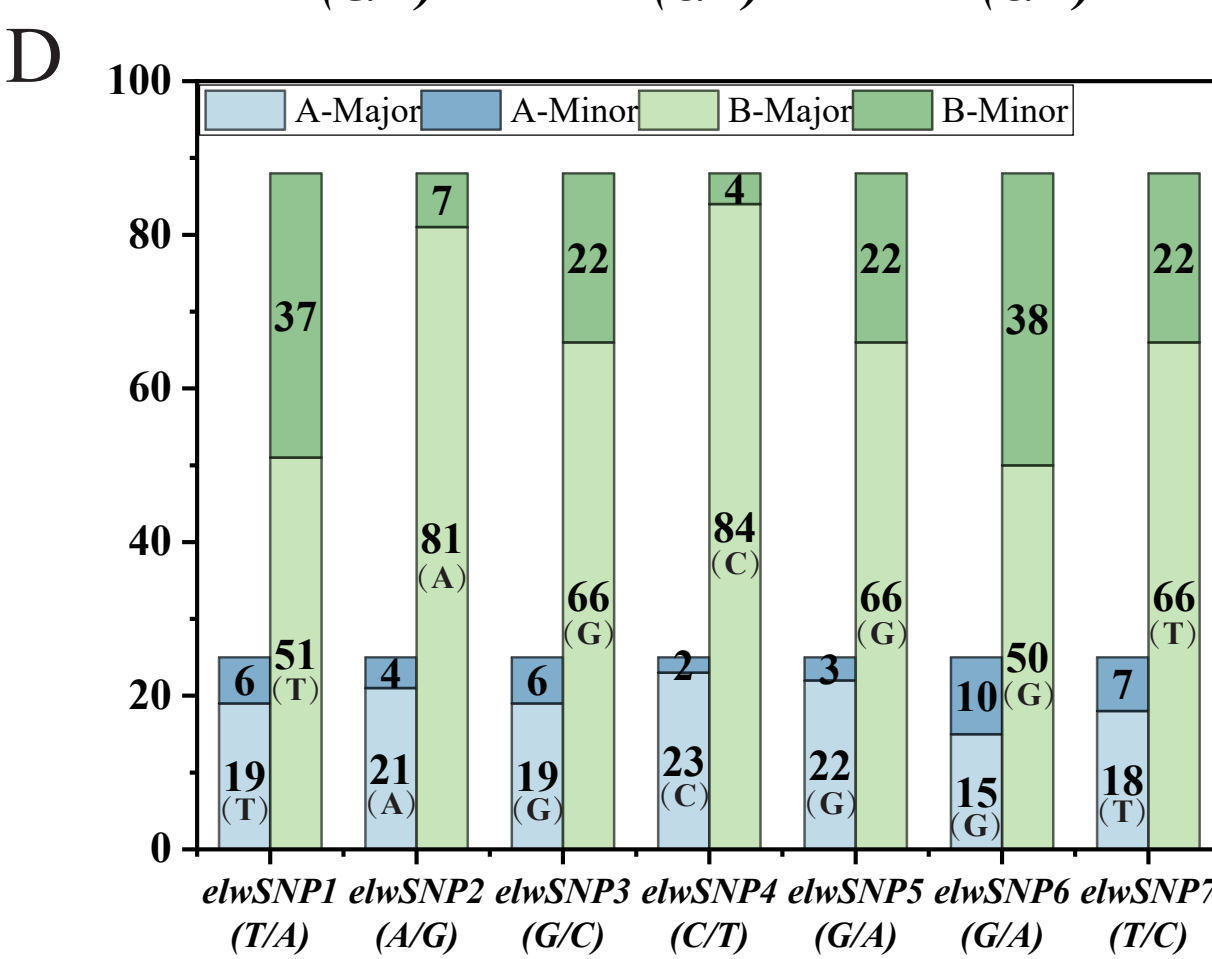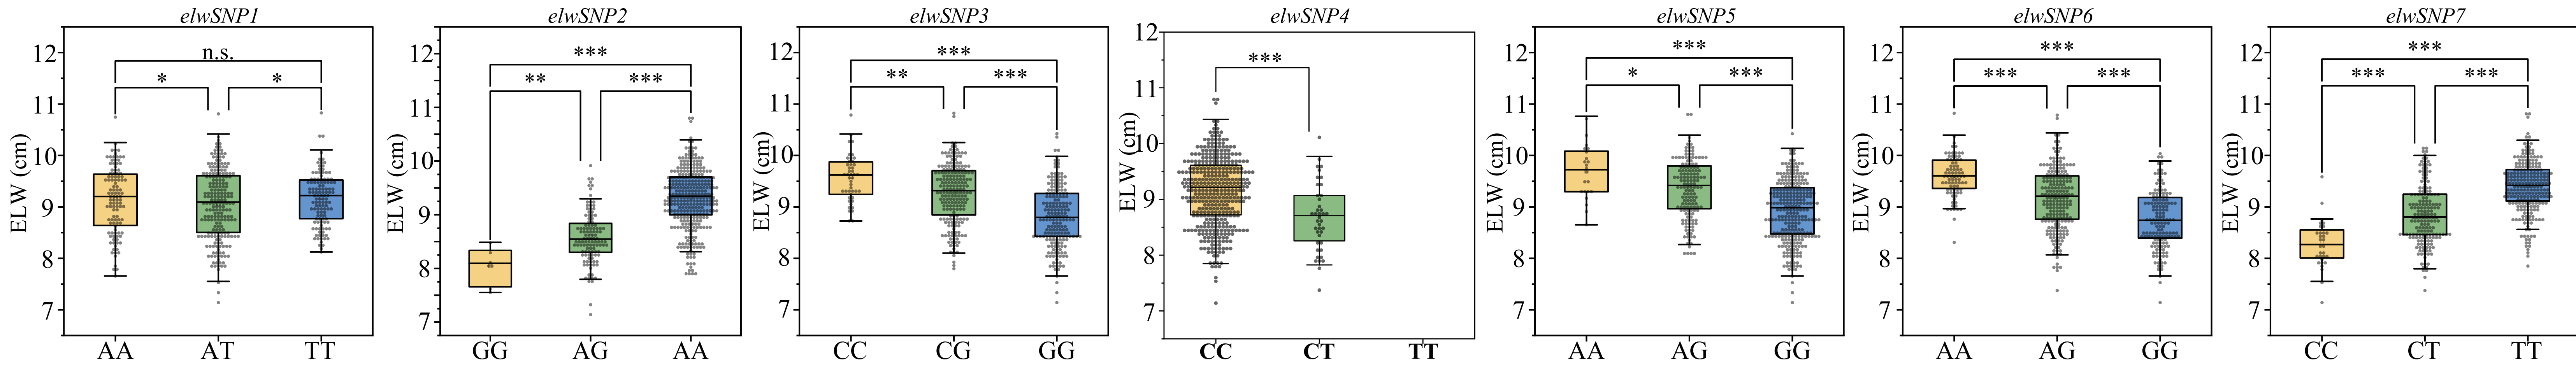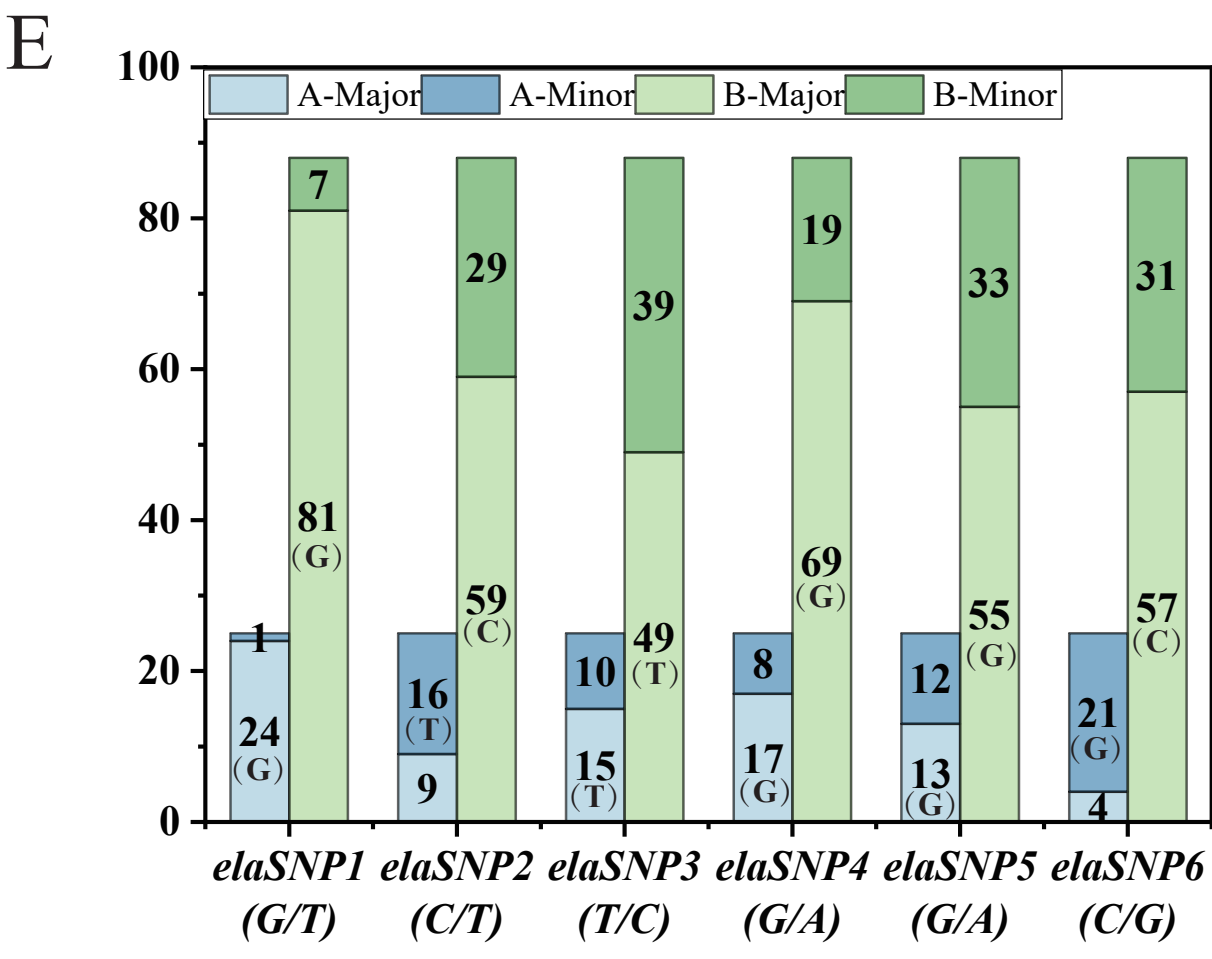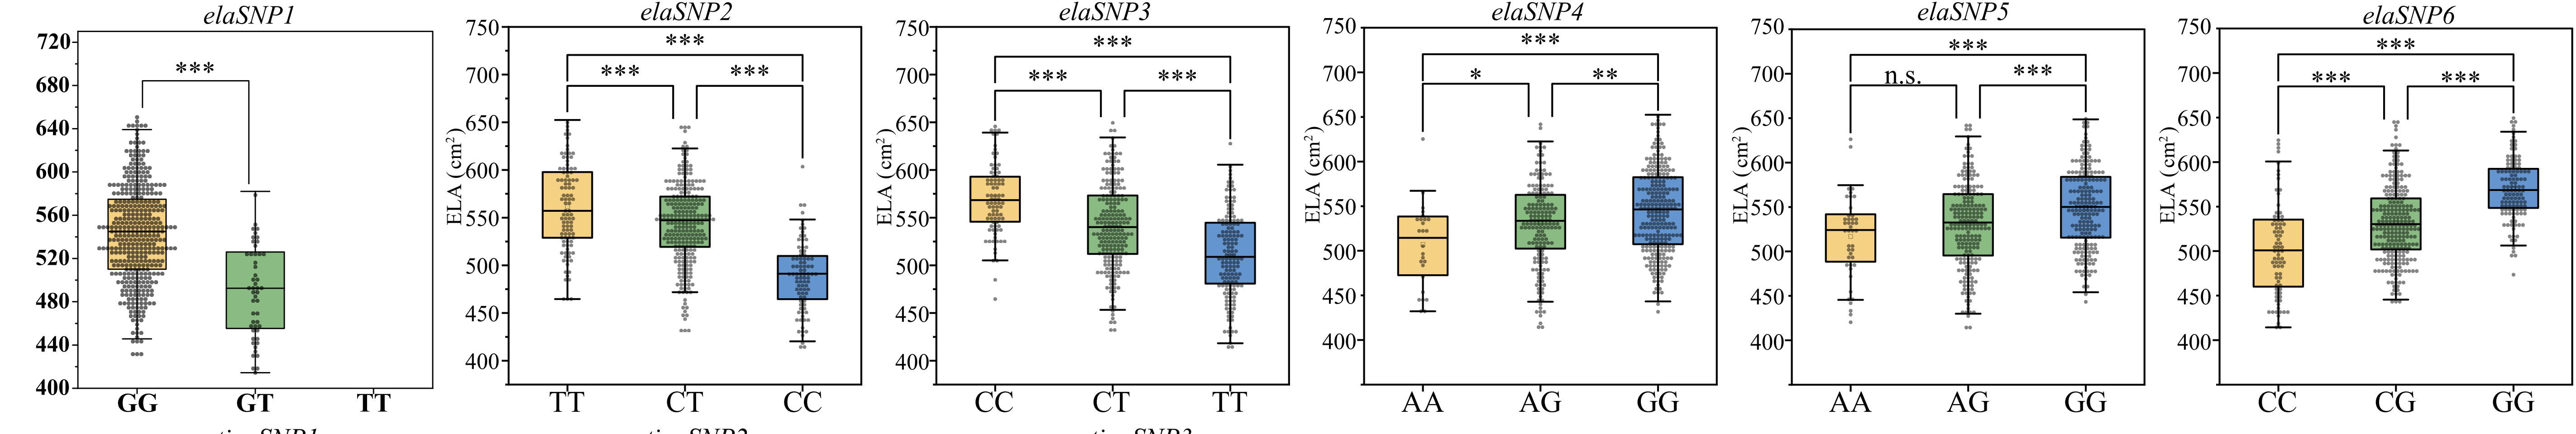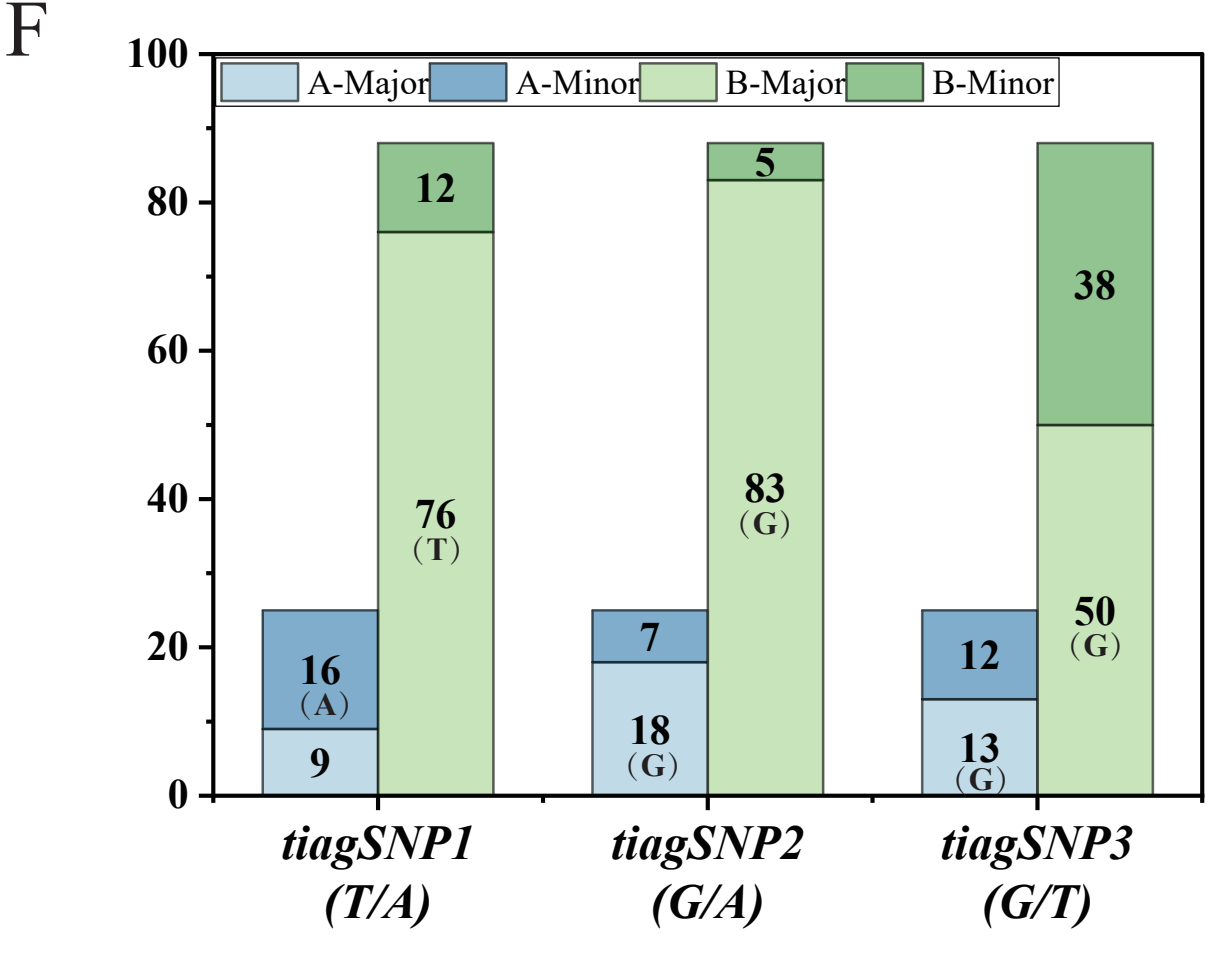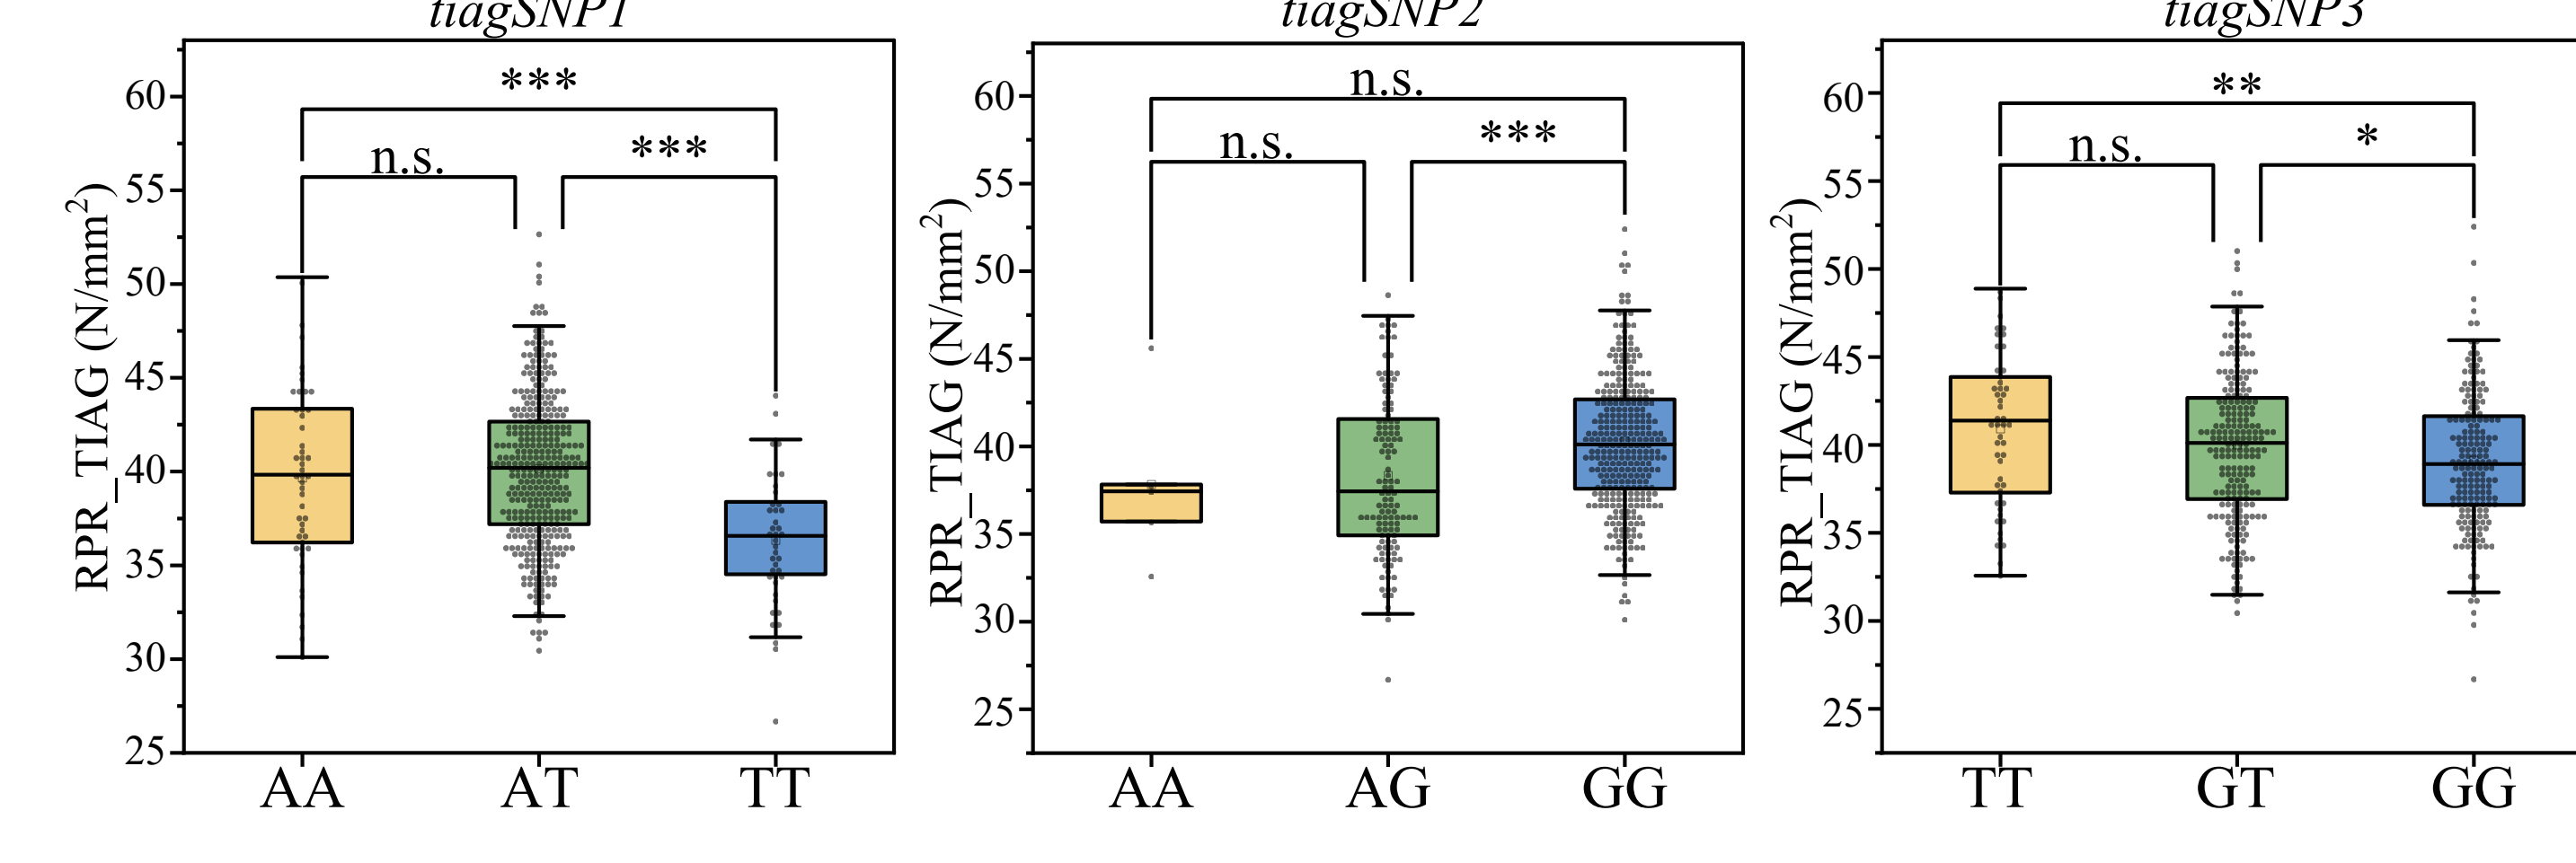

Supplement: s1 [file s1]

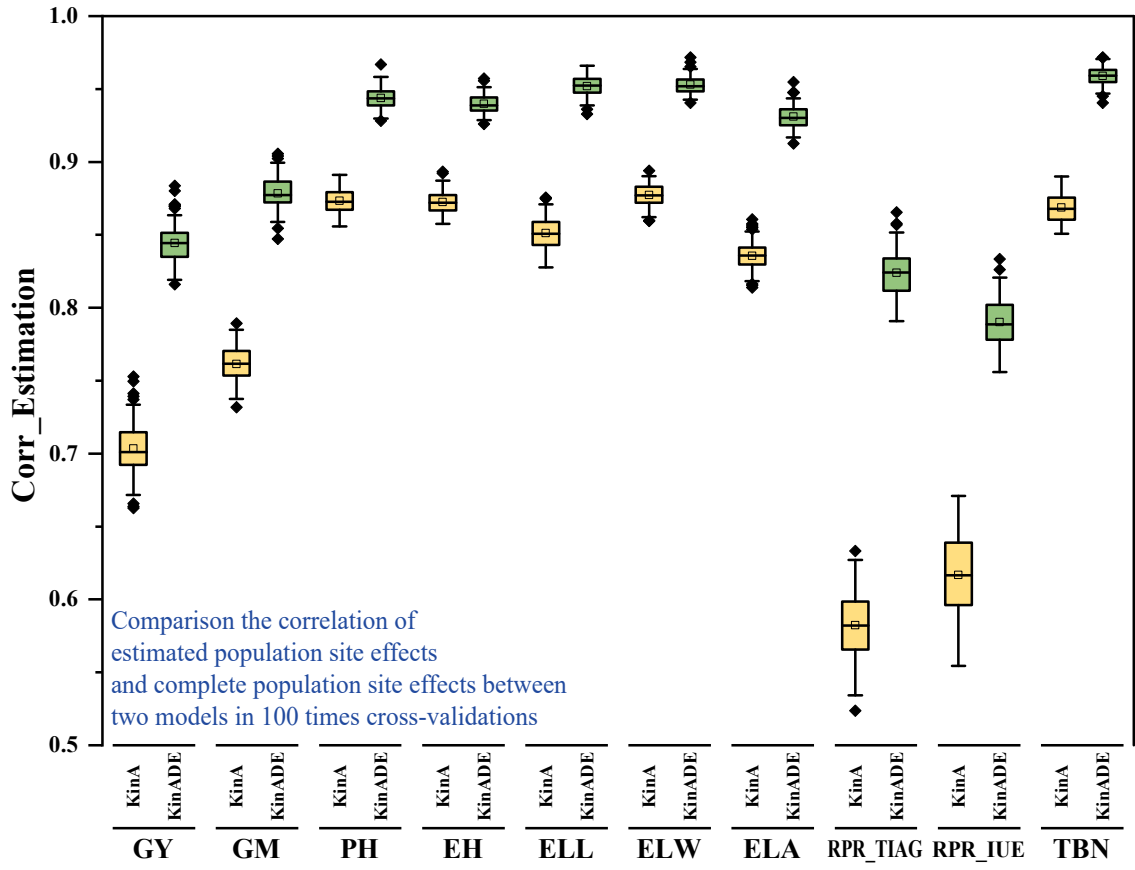

Supplement: s1 [file s1]
